# Supplementary material
Source: PubMed Central journal article supplement (PMC3103183)
Supplement: NIHMS278778-supplement-1_si_001.pdf [file NIHMS278778-supplement-1_si_001.pdf]

# Solid-State NMR Study of the Charge-Transfer Complex between Ubiquinone-8 and Disulfide Bond Generating Membrane Protein DsbB

Ming Tang, Lindsay J. Sperling, Deborah A. Berthold, Anna E. Nesbitt, Robert B. Gennis, Chad M.

Rienstra\*

Department of Chemistry, University of Illinois at Urbana-Champaign,

600 South Mathews Avenue, Urbana, Illinois 61801

E-mail: [rienstra@scs.uiuc.edu](mailto:rienstra@scs.uiuc.edu)

## Supporting Information

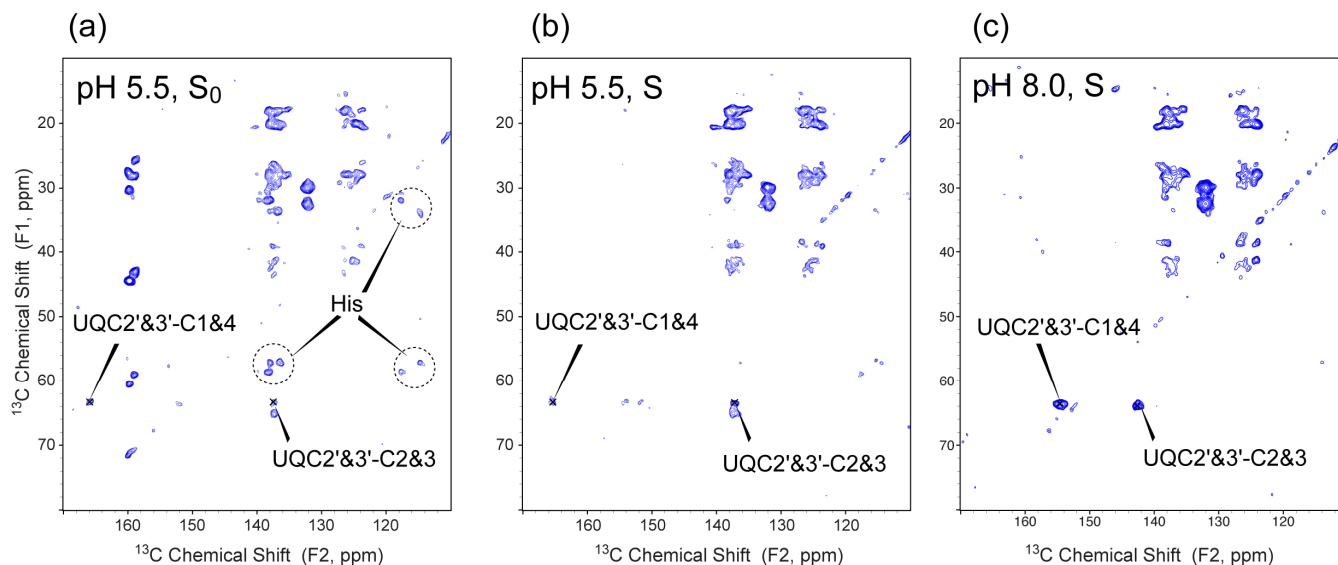

**Figure S1.**  $^{13}\text{C}$ - $^{13}\text{C}$  2D correlation spectra of FLYPW-DsbB(C41S) with 100 ms DARR mixing ( $B_0 = 14.1$  T,  $T_{\text{sample}} = -16.6$  °C, 1.5 s pulse delay, maximum  $t_1 = 10.24$  ms, maximum  $t_2 = 20.48$  ms) and 1.8 ms Hahn-echo before acquisition (a) without  $^{15}\text{N}$  REDOR pulses ( $S_0$  spectrum) at 5.5, (b) with  $^{15}\text{N}$  REDOR pulses (S spectrum) at pH 5.5 and (c) with  $^{15}\text{N}$  REDOR pulses (S spectrum) at pH 8.0.

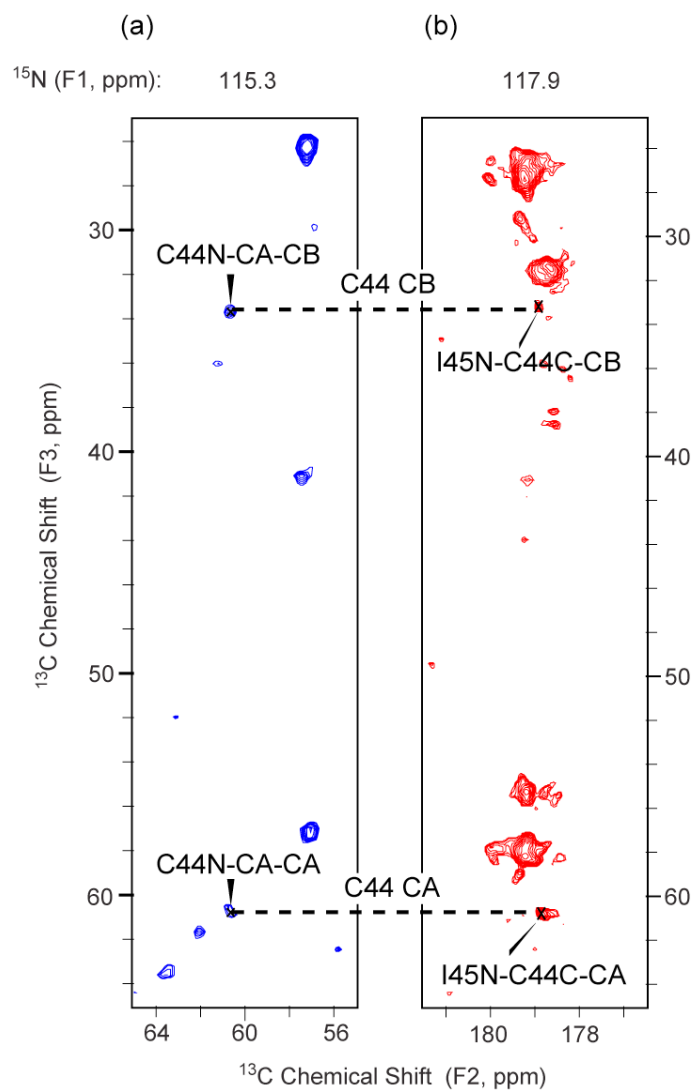

**Figure S2.** Strip plot of (a) NCACX 3D spectrum and (b) NCOCX 3D spectrum of U-DsbB(C41S) at pH 8.0 with 90 ms DARR mixing under 11.111 kHz MAS ( $B_0 = 11.8$  T,  $T_{\text{sample}} = -12$  °C, 1.5 s pulse delay). The assignments of C44 are marked.

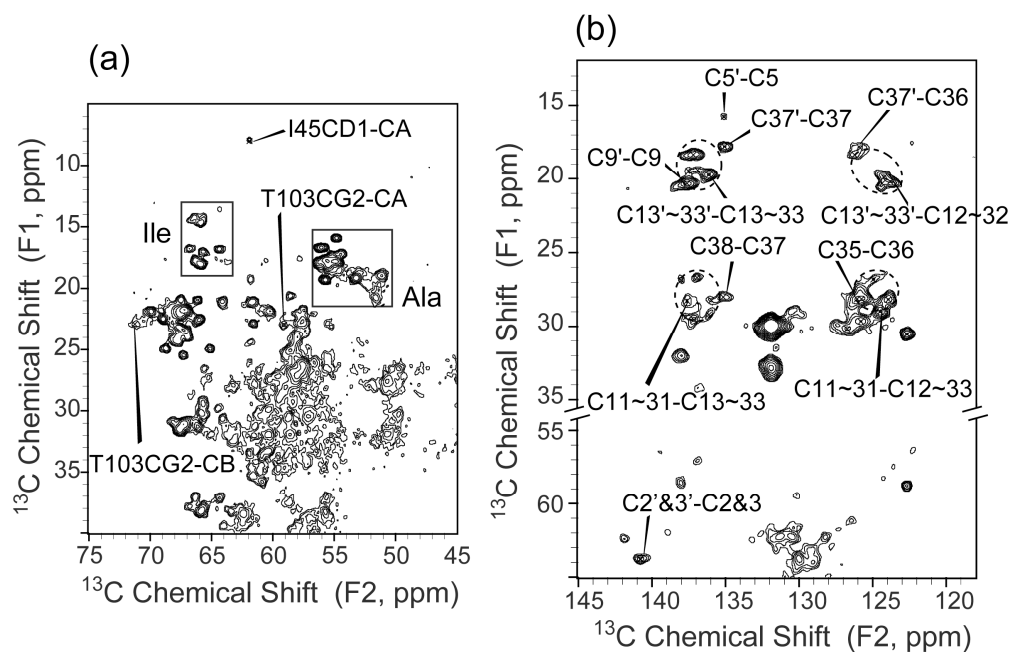

**Figure S3.** Expansions of (a) Ile, Ala, and other CA-CB correlations and (b) UQ-8 resonances regions from a  $^{13}\text{C}$ - $^{13}\text{C}$  2D correlation spectrum of DsbA(C33S)/DsbB\* complex at 12.5 kHz MAS with 25 ms DARR mixing ( $B_0 = 17.6$  T,  $T_{\text{sample}} = -12$  °C, 1.5 s pulse delay, 8 scans per row, maximum  $t_1 = 15.36$  ms, maximum  $t_2 = 20.48$  ms).

**Table S1.**  $^{13}\text{C}$  chemical shifts of UQ in various states (DSS scale, the solution shifts in TMS scale are converted by +2.0 ppm<sup>1</sup>). Carbonyl chemical shifts in DsbB with significant difference are bolded.

| Chemical Shifts (ppm)      | UQ-10 <sup>2</sup> | Ubiquinol-10 <sup>3</sup> | UQ-8 in DsbB(C41S) pH 8.0 | UQ-8 in DsbB(C41S) pH 5.5 |
|----------------------------|--------------------|---------------------------|---------------------------|---------------------------|
| C=O (1, 4)                 | 185.9, 186.7       | 141.9, 142.1              | <b>154.7</b>              | <b>165.5</b>              |
| C=C (2, 3)                 | 146.4, 146.2       | 138.9, 138.8              | 142.4                     | 137.5                     |
| C=C (5, 6)                 | 140.8, 143.7       | 120.0, 124.0              | 127.4, 135.6              | 126.8, 137.5              |
| C=C (13~37)                | 133.6, 136.9       | 137.3~136.9               | 139.0~135.2               | 139.0~135.2               |
| C=C (12~36)                | 126.2              | 126.4~125.9               | 126.6~123.6               | 126.6~123.6               |
| C=C (9)                    | 139.6              | 137.3                     | 140.2                     | 140.2                     |
| C=C (8)                    | 120.8              | 124.3                     | 123.7                     | 123.7                     |
| CH <sub>3</sub> O (2', 3') | 63.0               | 62.8, 62.7                | 63.6, 64.0                | 63.4, 65.2                |
| CH <sub>2</sub> (10~34)    | 41.7               | 41.8~41.7                 | 43.4~41.6                 | 43.4~41.6                 |
| CH <sub>2</sub> (11~35)    | 28.5               | 28.8~28.5                 | 30.3~27.3                 | 30.3~27.3                 |
| CH <sub>3</sub> (38)       | 27.7               | 28.9                      | 28.2                      | 28.2                      |
| CH <sub>2</sub> (7)        | 27.3               | 27.3                      | 26.6                      | 26.6                      |
| CH <sub>3</sub> (9'~37')   | 18.2               | 18.0                      | 20.7~17.9                 | 20.7~17.9                 |
| CH <sub>3</sub> (5')       | 13.9               | 14.0                      | 15.9                      | 15.0                      |

- (1) Morcombe, C. R.; Zilm, K. W. *J. Magn. Reson.* **2003**, *162*, 479.
- (2) Vanliemt, W. B. S.; Steggerda, W. F.; Esmeijer, R.; Lugtenburg, J. *Recl. Trav. Chim. Pays-Bas* **1994**, *113*, 153.
- (3) Afri, M.; Ehrenberg, B.; Talmon, Y.; Schmidt, J.; Cohen, Y.; Frimer, A. A. *Chem. Phys. Lipids* **2004**, *131*, 107.
